# Supplementary material
Source: ML conference proceedings conference paper supplement (https://proceedings.mlr.press/v115/salmon20a.html)
Supplement: Supplementary file 1 [file salmon20a-supp.pdf]

## A PROOFS OF THEOREMS 1 AND 2

**Theorem 1.** *The reduction from SSAT to POMDP guarantees that there exists a POMDP policy  $\pi$  for time steps 0 to  $|X|/2 - 1$  and optimal action at time step  $|X|/2$  with value function  $V^\pi = \Pr(\phi)$  iff there exists a policy tree  $\phi$  with satisfiability probability  $\Pr(\phi)$ .*

*Proof.* Consider a POMDP policy  $\pi$  (for time steps 0 to  $|X|/2 - 1$ ), which defines a policy tree  $\phi$ . Each branch yields a final (unnormalized) belief with mass

$$\hat{b}_{o_{1:|X|/2}}^\pi(prob) = b_0(prob) \Pr(o_{1:|X|/2}|prob, \pi) \quad (1)$$

Based on the properties of the reward function, the optimal expected reward of each branch at the last time step  $|X|/2$  is

$$\begin{aligned} R(\hat{b}_{o_{1:|X|/2}}^\pi) &= \max_a \sum_s \hat{b}_{o_{1:|X|/2}}^\pi(s) R(s, a) \quad (2) \\ &= \begin{cases} \Pr(o_{1:|X|/2}|prob, \pi) & \text{if branch is satisfying} \\ 0 & \text{otherwise} \end{cases} \quad (3) \end{aligned}$$

Hence the value of a policy is

$$\begin{aligned} V^\pi &= \sum_{o_{1:|X|/2}} R(\hat{b}_{o_{1:|X|/2}}^\pi) \quad (4) \\ &= \sum_{o_{1:|X|/2} \text{ is satisfying}} \Pr(o_{1:|X|/2}|prob, \pi) \quad (5) \\ &= \Pr(\phi) \quad (6) \end{aligned}$$

The above equation shows that the value of a policy is equal to the probability of satisfying the Boolean formula with the corresponding policy tree  $\phi$ .  $\square$

**Theorem 2.** *In the reduction of POMDP to SSAT, there exists a satisfiable policy tree,  $\phi$ , with probability  $\Pr(\phi)$  iff there exists a POMDP policy,  $\pi$ , with value function  $V^\pi = \Pr(\phi)$ .*

*Proof.* Consider a base case policy tree of size 1. Let the policy tree be  $\phi = \{x_a \equiv \hat{k}\}$  with clauses:

$$\bigwedge_{i \in \mathcal{S}} x_s \neq i \vee x_r \equiv \hat{k}|\mathcal{S}| + i \quad (7)$$

The probability of satisfiability of (7) is equivalent to

$$\begin{aligned} \Pr(\phi) &= \sum_i \Pr(x_s \equiv i) \Pr(x_r \equiv \hat{k}|\mathcal{S}| + i) \\ &= \sum_i b(i)r(i, \hat{k}) \quad (8) \end{aligned}$$

by using the distributions for the randomized variables:  $\Pr(x_s \equiv i) = b(i)$  and  $\Pr(x_r \equiv k|\mathcal{S}| + i) =$

$r(i, k), \forall i, k$ . However, (8) corresponds exactly to the policy that takes action  $a_1 = \hat{k}$  and has a value of  $V^\pi = \sum_i b(i)r(i, \hat{k})$ .

For the general case, we give a proof by induction. Assume we have a policy tree  $\phi_h$ , policy  $\pi_h$ , and we know  $\Pr(\phi_h) = V^{\pi_h}$ . Given  $\phi_{h+1}$  and  $\pi_{h+1}$  show that  $\Pr(\phi_{h+1}) = V^{\pi_{h+1}}$ .

Since we are given the policy tree, all the actions are known. Therefore, if we simplify first by making the assignments in  $\phi_{h+1}$ , then only the randomized variables will remain in the quantifier prefix. Any subset of variables can now be re-ordered freely. Based on the number of randomized variables we introduced for horizon  $h$  and  $h + 1$ , encoding the probability of satisfiability is:

$$\begin{aligned} \Pr(\phi_{h+1}) &= \sum_{v_1, \dots, v_{h+1}} \sum_{z_1, \dots, z_h} \sum_{s_1, \dots, s_{h+1}} \prod_{l=1}^{h+1} \Pr(x_p^l = v_l, x_s^l = i, x_o^l = z_l, x_r^l) \\ &\quad \prod_{l=1}^h \Pr(x_\Omega^l, x_T^l | x_p^l = v_l, x_s^l = i, x_o^l = z_l) \quad (9) \end{aligned}$$

To achieve Eq. 10, the distribution for  $x_p$  is just a uniform distribution that can be factored out as  $2^{-h}$ . However, each  $x_p$  is controlling the length of the process, so it naturally controls how many terms contribute to the total sum if we re-arrange by horizon and then simplify. Note that given values for  $x_p, x_o, x_s$  the other variables are forced by unit propagation to a specific value.

$$\begin{aligned} &= 2^{-(h+1)} \sum_{\hat{h}=1}^{h+1} \sum_{z_1, \dots, z_{\hat{h}-1}} \sum_{s_1, \dots, s_{\hat{h}}} \prod_{l=1}^{\hat{h}} \Pr(x_s^l = i, x_o^l = z_l, x_r^l) \\ &\quad \prod_{l=1}^{\hat{h}-1} \Pr(x_\Omega^l, x_T^l | x_p^l = v_l, x_s^l = i, x_o^l = z_l) \quad (10) \end{aligned}$$

Similarly, for the distribution  $x_o$  the constant,  $|\mathcal{O}|^{h-1}$ , can be factored out in front and its value is used in the conditional distribution  $x_\Omega$ .

$$\begin{aligned} &= 2^{-(h+1)} |\mathcal{O}|^{-h} \sum_{\hat{h}=1}^{h+1} \sum_{z_1, \dots, z_{\hat{h}-1}} \sum_{s_1, \dots, s_{\hat{h}}} \prod_{l=1}^{\hat{h}} \Pr(x_s^l = i, x_r^l) \\ &\quad \prod_{l=1}^{\hat{h}-1} \Pr(x_\Omega^l, x_T^l | x_p^l = v_l, x_s^l = i, x_o^l = z_l) \quad (11) \end{aligned}$$

the next variable  $x_s^l$  has uniform distribution for all  $l > 1$  and the initial belief when  $l = 1$ . Therefore, we can simplify the equation by pulling out the constant factors again.

$$\begin{aligned} &= 2^{-(h+1)} (|\mathcal{O}| \cdot |\mathcal{S}|)^{-h} \sum_{\hat{h}=1}^{h+1} \sum_{z_1, \dots, z_{\hat{h}-1}} \sum_{s_1, \dots, s_{\hat{h}}} \Pr(x_s^1 = i) \\ &\quad \prod_{l=1}^{\hat{h}} \Pr(x_r^l) \prod_{l=1}^{\hat{h}-1} \Pr(x_\Omega^l, x_T^l | x_p^l = v_l, x_s^l = i, x_o^l = z_l) \quad (12) \end{aligned}$$

According to the distribution  $x_p$ , rewards  $x_r$  will only be given at the end of the process for each  $\hat{h}$ .

$$= 2^{-(h+1)} (|\mathcal{O}| \cdot |\mathcal{S}|)^{-h} \sum_{\hat{h}=1}^{h+1} \sum_{z_1, \dots, z_{\hat{h}-1}}^{|\mathcal{O}|} \sum_{s_1, \dots, s_{\hat{h}}}^{|\mathcal{S}|} \Pr(x_s^1 = i) \Pr(x_r^{\hat{h}}) \prod_{l=1}^{\hat{h}-1} \Pr(x_{\Omega}^l, x_T^l | x_p^l = v_l, x_s^l = i, x_o^l = z_l) \quad (13)$$

If we replace the distributions below with their definitions and replace constants with the proportional relation, we obtain

$$\propto \sum_{\hat{h}=1}^{h+1} \sum_{z_1, \dots, z_{\hat{h}-1}}^{|\mathcal{O}|} \sum_{s_1, \dots, s_{\hat{h}}}^{|\mathcal{S}|} b(s_1) \prod_{l=1}^{\hat{h}-1} \Omega_{s_{l+1}, z_l}^{\alpha_l} T_{s_l, s_{l+1}}^{\alpha_l} r(s_{\hat{h}}, a_{\hat{h}}) \quad (14)$$

$$= \sum_{s_1}^{|\mathcal{S}|} b(s_1) \left( r(s_1, a_1) + \sum_{z_1}^{|\mathcal{O}|} \sum_{s_2}^{|\mathcal{S}|} \Omega_{s_2, z_1}^{\alpha_1} T_{s_1, s_2}^{\alpha_1} \Pr(\phi_{\hat{h}}) \right) \quad (15)$$

where  $\Pr(\phi_{\hat{h}}) = r(s, a) + \sum_z \sum_{s'} \Omega_{s', z}^a T_{s, s'}^a \Pr(\phi_{\hat{h}-1})$

Now consider the reverse. Given a policy,  $\pi_{h+1}$ , with value function  $V^{\pi_{h+1}}$  there exists a satisfiable policy tree,  $\phi_{h+1}$ , with satisfiability probability  $\Pr(\phi_{h+1})$  such that  $V^{\pi_{h+1}} = \Pr(\phi_{h+1})$ . First, Bellman's equation for a  $h+1$  horizon policy is:

$$V^{\pi_{h+1}} = \sum_s b^{h+1}(s) \left( r(s, a) + \sum_o \sum_{s'} \Omega_{s', o}^a T_{s, s'}^a V^{\pi_h}(b_o^a) \right), \quad a = \pi(b) \quad (16)$$

However, any  $h+1$  horizon policy can be written as a linear combination of  $h$  horizon policies. Since we know  $\Pr(\phi_{\hat{h}}) = V_{\hat{h}}^{\pi}$  by the inductive step, we conclude, that (15) and (16) are equal. Therefore, the probability of satisfying a  $h+1$  depth policy tree corresponds to the value function of a  $h+1$  step policy.  $\square$

## B PROBLEM STATISTICS

We test the improvements to the watch literal rule on a variety of problems from 3 different benchmark types as shown in Table 1. The POMDP problems are from Cassandra's repository [?] and consist of two easy and two hard problems that have quite a large number of literals per clause and variable cardinality. The inference problems are from a prior probabilistic inference competition [?] and tend to be highly structured and contain a large number of variables and clauses.

Finally, the random benchmarks consist of a series of variables with alternating quantifiers in 3-SAT and 10-SAT forms that were generated by a procedure. Assume we are given  $V$  the number of variables,  $C$  the number of clauses,  $k$  the number of literals in a clause,  $t$  the number

of values for each variable and  $p$  the probability for each variable to be existentially quantified ( $1-p$  is the probability for each variable to be randomly quantified). We can generate a problem by first sampling the quantifier for each variable  $Q(v_i)$  and if randomly quantified, draw its distribution from a uniform Dirichlet with dimension  $t$ . For each clause  $c_i$  where  $i \in \{0, \dots, C-1\}$  a variable is sampled uniformly from  $\{1, \dots, V\}$  and a value is sampled uniformly from  $\{0, \dots, t-1\}$  repeatedly to generate  $k$  literals for each clause.

| Benchmark | Problem          | #var    | #clause | avg #value | avg #literal |
|-----------|------------------|---------|---------|------------|--------------|
| RANDOM    | fail-learn1      | 50      | 120     | 2.00       | 3.00         |
|           | pure1            | 50      | 120     | 2.00       | 3.00         |
|           | big1             | 30      | 450     | 2.00       | 10.00        |
|           | big2             | 15      | 60      | 4.00       | 10.00        |
| POMDP     | tiger.95_H10     | 157     | 304     | 2.31       | 5.60         |
|           | ejs7_H10         | 121     | 212     | 2.16       | 4.58         |
|           | query.s4_H2      | 657     | 27,868  | 42.68      | 160.40       |
|           | aloha.10_H3      | 1,094   | 18,637  | 17.14      | 64.39        |
| INFERENCE | mastermind.04.08 | 6,319   | 14,670  | 2.00       | 2.90         |
|           | fs-29            | 327,787 | 803,068 | 2.00       | 2.74         |

Table 1: Basic information for each benchmark problem.
